# Supplementary material for: A comprehensive mechanistic model of iron metabolism inSaccharomyces cerevisiae
Source: Royal Society of Chemistry journal article supplement (doi:10.1039/c9mt00199a), 2019-01-01
Supplement: c9mt00199a1.pdf [file c9mt00199a1.pdf]

**Electronic Supplemental Information for**

Lindahl, 2019 A comprehensive mechanistic model of iron metabolism in *Saccharomyces cerevisiae*

Table S1. The ironome of *Sacchromyces cerevisiae* circa 2019.

| Num. | Name (alias) | Identifier | Location                                                 | Iron Center                                                                                                                    | Description                                                        | References                 |
|------|--------------|------------|----------------------------------------------------------|--------------------------------------------------------------------------------------------------------------------------------|--------------------------------------------------------------------|----------------------------|
| 1    | Fit1         | YDR534C    | Cell Wall                                                | Unknown                                                                                                                        | Promotes Fe <sup>III</sup> siderophore import                      | 5, 6, 7, 8, 9              |
| 2    | Fit2         | YOR382W    | Cell Wall                                                | Unknown                                                                                                                        | Promotes Fe <sup>III</sup> siderophore import                      | 5, 6, 7, 8, 9              |
| 3    | Fit3         | YOR383C    | Cell Wall                                                | Unknown                                                                                                                        | Promotes Fe <sup>III</sup> siderophore import                      | 5, 6, 7, 8, 9              |
| 4    | Arn1 (Any1)  | YHL040C    | Plasma membrane (endosomes, trans-Golgi; vacuolar lumen) | Translocates Fe <sup>III</sup> siderophore                                                                                     | Transporter for ferrichrome iron chelate                           | 5, 6                       |
| 5    | Arn2 (Taf1)  | YHL047C    | Plasma membrane                                          | Translocates Fe <sup>III</sup> siderophore                                                                                     | Uptake of iron triacetylfulvarinine                                | 5, 6                       |
| 6    | Arn3 (Sit1)  | YEL065W    | Plasma membrane                                          | Translocates Fe <sup>III</sup> siderophore                                                                                     | Ferrioxamine B transporter                                         | 5, 6                       |
| 7    | Arn4 (Enb1)  | YOL158C    | Plasma membrane                                          | Translocates Fe <sup>III</sup> siderophore                                                                                     | Endosomal ferric enterobactin transporter                          | 5, 6                       |
| 8    | Fre1         | YLR214W    | Plasma membrane                                          | Two permanent Heme b (cyt b561) centers; "Bis-heme"                                                                            | flavo-cytochrome metallo-reductase                                 | 5, 12, 14, 15              |
| 9    | Fre2         | YKL220c    | Plasma membrane                                          | Probably Bis-heme                                                                                                              | Metallo-reductase                                                  | 238                        |
| 10   | Fre3         | YOR381w    | Plasma membrane                                          | Probably Bis-heme                                                                                                              | Metallo-reductase                                                  | 239                        |
| 11   | Fre4         | YNR060w    | Plasma membrane                                          | Probably Bis-heme                                                                                                              | Metallo-reductase                                                  | 239                        |
| 12   | Fre5         | YOR384w    | Mitochondria ?                                           | Probably Bis-heme                                                                                                              | Metallo-reductase?                                                 | 239                        |
| 13   | Fre7         | YOL152w    | Plasma membrane                                          | Probably Bis-heme                                                                                                              | Copper regulated metallo-reductase                                 | 176                        |
| 14   | Fre8         | YLR047c    | ER/Vacuole?                                              | Probably Bis-heme                                                                                                              | Metallo-reductase?                                                 | 239                        |
| 15   | Fet3         | YMR058W    | Plasma membrane                                          | Binds Fe <sup>II</sup> ; oxidizes it to Fe <sup>III</sup> ; then releases Fe <sup>III</sup>                                    | Multicopper ferroxidase                                            | 12, 14, 15, 16, 17, 18, 19 |
| 16   | Ftr1         | YER145C    | Plasma membrane                                          | Fe <sup>III</sup> translocates through a channel in the protein                                                                | High-affinity nutrient iron permease                               | 5, 16, 17, 18, 19          |
| 17   | Fet4         | YMR319C    | Plasma membrane                                          | Fe <sup>II</sup> translocates through the protein                                                                              | Low-affinity nutrient iron importer; dominates during hypoxia      | 20                         |
| 18   | Smf1         | YOL122C    | Plasma membrane                                          | Fe <sup>II</sup> translocates through the protein                                                                              | Low-affinity nutrient iron importer; Nramp family                  | 21, 22                     |
| 19   | Cfd1         | YIL003W    | Cytosol                                                  | Dimer binds 2 [Fe <sub>2</sub> S <sub>2</sub> ] clusters; reductively couples to 1 transient [Fe <sub>4</sub> S <sub>4</sub> ] | P-loop NTPase; part of the early CIA complex; interacts with Nbp35 | 21, 24, 25                 |
| 20   | Nbp35        | YGL091C    | Cytosol                                                  | Dimer binds 2 [Fe <sub>2</sub> S <sub>2</sub> ] clusters;                                                                      | P-loop NTPase; part of the early CIA complex; interacts with       | 24, 25, 26                 |

|    |                               |           |                                              |                                                                                                                                                   |                                                            |                              |
|----|-------------------------------|-----------|----------------------------------------------|---------------------------------------------------------------------------------------------------------------------------------------------------|------------------------------------------------------------|------------------------------|
|    |                               |           |                                              | reductively couples to 1 transient [Fe <sub>4</sub> S <sub>4</sub> ] cluster; also contains 1 permanent [Fe <sub>4</sub> S <sub>4</sub> ] cluster | Cfd1                                                       |                              |
| 21 | Dre2 (Ciapin1, anamorsin)     | YKR071C   | Cytosol (mito IMS; nucleus; membrane bound?) | 1[Fe <sub>2</sub> S <sub>2</sub> ] and 1[Fe <sub>4</sub> S <sub>4</sub> ] (or 2[Fe <sub>2</sub> S <sub>2</sub> ])                                 | Reductant for CIA and others                               | 24, 61, 240, 241, 242        |
| 22 | Tah18 (Ndor1)                 | YPR048W   | Cytosol                                      | none                                                                                                                                              | Flavin containing partner to Dre2                          | 32, 33, 240                  |
| 23 | Nar1 (Narf1; IOP1)            | YNL240C   | Cytosol                                      | 1 permanent [Fe <sub>4</sub> S <sub>4</sub> ] cluster and a second cluster that is surface-exposed and unstable.                                  | Link between early and late CIA complex                    | 32, 33, 34                   |
| 24 | Cia1                          | YDR267C   | Cytosol                                      | None                                                                                                                                              | Late CIA component 1                                       | 35                           |
| 25 | Cia2                          | YHR122W   | Cytosol                                      | None                                                                                                                                              | Late CIA component 2                                       | 243                          |
| 26 | Mms19                         | YIL128W   | Cytosol                                      | None                                                                                                                                              | Late CIA component                                         | 90                           |
| 27 | Lto1                          | YNL260C   | Cytosol                                      | None                                                                                                                                              | Recruits aRli1 to CIA for cluster insertion                | 35                           |
| 28 | Yae1                          | YJR067C   | Cytosol                                      | None                                                                                                                                              | Recruits aRli1 to CIA for cluster insertion                | 35                           |
| 29 | Rli1                          | YDR091C   | Cytosol                                      | Two [Fe <sub>4</sub> S <sub>4</sub> ]                                                                                                             | ABC protein sub-family E required for activating ribosomes | 35                           |
| 30 | Dph1                          | YIL103W   | Cytosol                                      | [Fe <sub>4</sub> S <sub>4</sub> ] (radical SAM)                                                                                                   | Diphthamide synthesis; modify His of EF2                   | 36                           |
| 31 | Dph2                          | YKL191W   | Cytosol                                      | [Fe <sub>4</sub> S <sub>4</sub> ] (radical SAM)                                                                                                   | Diphthamide biosynthesis; transfers ACP to EF2             | 36                           |
| 32 | Dph3 (Kti11)                  | YBL071W-A | Cytosol                                      | Mononuclear Fe <sup>II</sup> (cys) <sub>4</sub>                                                                                                   | Electron donor to Dph1:Dph2                                | 36, 37, 38                   |
| 33 | Cbr1                          | YIL043C   | Cytosol                                      | None                                                                                                                                              | Cytochrome b5 reductase; NAHH dependent                    | 26, 37, 38                   |
| 34 | Dph4 (Jjj3)                   | YJR097W   | Cytosol                                      | Mononuclear Fe <sup>II</sup> (cys) <sub>4</sub>                                                                                                   | Involved in Protein synthesis                              | 39, 40                       |
| 35 | Elp3 (Kti8; Tot3; Kat9; HPA1) | YPL086C   | Cytosol                                      | [Fe <sub>4</sub> S <sub>4</sub> ] (radical SAM)                                                                                                   | Subunit of elongator complex; tRNA modification            | 41, 42, 43, 44, 45, 46, 47   |
| 36 | Leu1                          | YGL009C   | Cytosol                                      | [Fe <sub>4</sub> S <sub>4</sub> ]                                                                                                                 | isopropylmalate isomerase                                  | 48                           |
| 37 | Glt1 (GOGAT)                  | YDL171C   | Cytosol                                      | [Fe <sub>4</sub> S <sub>4</sub> ]                                                                                                                 | Glutamate synthase                                         | 49, 50                       |
| 38 | Met8                          | YBR213W   | Cytosol                                      | Fe <sup>II</sup> converts to siroheme                                                                                                             | Dehydrogenase; siroheme ferrochelatase                     | 54, 55                       |
| 39 | Met5                          | YJR137C   | Cytosol                                      | siroheme + [Fe <sub>4</sub> S <sub>4</sub> ]                                                                                                      | Sulfite reductase, β subunit                               | 51, 52, 53, 55, 243          |
| 40 | Ade4                          | YMR300C   | cytosol                                      | [Fe <sub>4</sub> S <sub>4</sub> ]                                                                                                                 | Glutamine phosphoribosylpyrophosphate amidotransferase     | 56, 57                       |
| 41 | Bna1 (HAAO; HAO; HAD)         | YJR025C   | cytosol                                      | Fe <sup>II</sup> (cys)                                                                                                                            | 3-hydroxyanthranilate 3,4-dioxygenase                      | 58                           |
| 42 | Tyw1                          | YPL207W   | cytosol                                      | [Fe <sub>4</sub> S <sub>4</sub> ] (radical SAM)                                                                                                   | Wybutosine-modified tRNA biosynthesis                      | 59, 60                       |
| 43 | Rnr4                          | YGR180C   | Cytosol (or nucleus)                         | none                                                                                                                                              | Stabilizes and activates Rnr2                              | 61, 62, 63, 64, 65           |
| 44 | Rnr2                          | YJL026W   | Cytosol (or nucleus)                         | [Fe-O-Fe]                                                                                                                                         | Ribonucleotide Reductase, small R2 subunit                 | 61, 62, 63, 64, 65, 192, 245 |

|    |                           |         |                                                                                                          |                                                             |                                                                                       |                                                 |
|----|---------------------------|---------|----------------------------------------------------------------------------------------------------------|-------------------------------------------------------------|---------------------------------------------------------------------------------------|-------------------------------------------------|
| 45 | Grx3                      | YDR098C | Cytosol (or nucleus)                                                                                     | [Fe <sub>2</sub> S <sub>2</sub> ] (homodimer only)          | Monothiol Cytosolic Glutaredoxin 3                                                    | 66,67                                           |
| 46 | Grx4                      | YER174C | Cytosol (or nucleus)                                                                                     | [Fe <sub>2</sub> S <sub>2</sub> ] (homodimer only)          | Monothiol Cytosolic Glutaredoxin 4                                                    | 66, 67                                          |
| 47 | Bol2 (Fra2; Aim15; BolA2) | YGL220W | Cytosol                                                                                                  | [Fe <sub>2</sub> S <sub>2</sub> ] (heterodimer with Grx3/4) | Similar to monothiol Glutaredoxins                                                    | 67, 68, 69                                      |
| 48 | Ctt1                      | YGR088W | Cytosol                                                                                                  | Heme b                                                      | Catalase T                                                                            | 70, 71, 72                                      |
| 49 | Cta1                      | YDR256C | Peroxisomal membrane and mitochondria                                                                    | Heme b                                                      | Catalase A                                                                            | 72                                              |
| 50 | Yhb1                      | YGR234W | Mito matrix during anoxic conditions; cytosol and mito during aerobic conditions; also found in mito IMS | Heme b                                                      | flavo-hemoglobin (or NO dioxygenase)                                                  | 73, 74, 75, 76, 77                              |
| 51 | Ccp1                      | YKR066C | Mito IMS                                                                                                 | Heme b                                                      | Cytochrome c peroxidase                                                               | 246                                             |
| 52 | Ntg2                      | YOL043C | nucleus                                                                                                  | [Fe <sub>4</sub> S <sub>4</sub> ]                           | Endonuclease III-like 1; bifunctional DNA N-glycosylase/DNA lyase                     | 35, 78, 79, 80, 81, 82, 83, 84, 85              |
| 53 | Dna2                      | YHR164C | nucleus                                                                                                  | [Fe <sub>4</sub> S <sub>4</sub> ]                           | Nuclease and Helicase                                                                 | 61, 86, 87, 88                                  |
| 54 | Rad3 (TFIIH)              | YER171W | Nucleus (also cytosol)                                                                                   | [Fe <sub>4</sub> S <sub>4</sub> ]                           | Basal transcription factor complex; Helicase XPD subunit; DNA excision repair protein | 35, 89, 90, 91, 92                              |
| 55 | Chl1                      | YPL008W | nucleus                                                                                                  | [Fe <sub>4</sub> S <sub>4</sub> ]                           | Helicase, sister chromatid cohesion, heterochromatin organization                     | 35                                              |
| 56 | Pri2                      | YKL045W | nucleus                                                                                                  | [Fe <sub>4</sub> S <sub>4</sub> ]                           | DNA primase, large subunit                                                            | 35, 93, 94, 95, 96, 98, 99, 100                 |
| 57 | Pol1 (Cdc17; Crt5; Hpr3)  | YNL102W | Nucleus                                                                                                  | [Fe <sub>4</sub> S <sub>4</sub> ]                           | DNA polymerase I alpha-primase, catalytic subunit                                     | 35, 93, 96, 97, 98, 99, 100, 101, 102, 103, 233 |
| 58 | Pol2                      | YNL262W | nucleus                                                                                                  | [Fe <sub>4</sub> S <sub>4</sub> ] (uncertain)               | DNA polymerase II epsilon catalytic subunit A                                         | 33, 35, 104, 105                                |
| 59 | Pol3                      | YDL102W | nucleus                                                                                                  | [Fe <sub>4</sub> S <sub>4</sub> ]                           | DNA polymerase delta catalytic subunit                                                | 35, 100, 106, 247, 248                          |
| 60 | Rev3                      | YPL167C | nucleus                                                                                                  | [Fe <sub>4</sub> S <sub>4</sub> ]                           | Catalytic subunit of DNA polymerase zeta                                              | 100, 107, 248                                   |
| 61 | Tpa1                      | YER049W | nucleus                                                                                                  | Fe <sup>II</sup>                                            | 2-oxoglutarate-dependent dioxygenase                                                  | 108, 249                                        |
| 62 | Aft1                      | YGL071W | Nucleus and cytosol                                                                                      | [Fe <sub>2</sub> S <sub>2</sub> ]                           | Primary Iron Regulon Transcription factor                                             | 6, 109, 110, 111, 112, 113, 114, 217            |
| 63 | Aft2                      | YPL202C | Nucleus and cytosol                                                                                      | [Fe <sub>2</sub> S <sub>2</sub> ]                           | Secondary Iron Regulon Transcription factor                                           | 62, 110, 112, 118                               |
| 64 | Cth1                      | YDR151C | Nucleus and cytosol                                                                                      | None                                                        | mRNA degradation of respiration-related transcripts                                   | 63, 116, 117, 118                               |
| 65 | Cth2 (TIS11)              | YLR136C | Nucleus and cytosol                                                                                      | None                                                        | mRNA degradation of respiration-related transcripts                                   | 63, 116, 117, 118                               |
| 66 | Yap5                      | YIR018W | nucleus                                                                                                  | Two [Fe <sub>2</sub> S <sub>2</sub> ]                       | Transcriptional Regulator of Ccc1                                                     | 59, 119, 120, 121, 122, 123, 250                |
| 67 | Hap1                      | YLR256W | Nucleus in equilibrium with cytosol                                                                      | Binds Heme b                                                | Heme regulation                                                                       | 124                                             |
| 68 | Hap2                      | YGL237C | nucleus                                                                                                  | Heme activated                                              | Subunit of the Hap2/3/4/5                                                             | 125                                             |

|     |                               |           |             |                                                                                                             |                                                  |                                  |
|-----|-------------------------------|-----------|-------------|-------------------------------------------------------------------------------------------------------------|--------------------------------------------------|----------------------------------|
|     |                               |           |             |                                                                                                             | complex                                          |                                  |
| 69  | Hap3                          | YBL021C   | nucleus     | Heme activated                                                                                              | Subunit of the Hap2/3/4/5 complex                | 125                              |
| 70  | Hap4                          | YKL109W   | nucleus     | Heme activated                                                                                              | Subunit of the Hap2/3/4/5 complex                | 125                              |
| 71  | Hap5                          | YOR358W   | nucleus     | Heme activated                                                                                              | Subunit of the Hap2/3/4/5 complex                | 125                              |
| 72  | Rox1 (REO1)                   | YPR065W   | nucleus     | Hap1-dependent                                                                                              | Heme-dependent repressor of Hap1-dependent genes | 125                              |
| 73  | Nfs1                          | YCL017C   | Mito matrix | None                                                                                                        | Cysteine Desulfurase                             | 126, 251, 252, 253               |
| 74  | Isd11                         | YER048W-A | Mito matrix | None                                                                                                        | Complex of cysteine desulfurase                  | 251, 252, 253                    |
| 75  | Acp1                          | YKL192C   | Mito matrix | None                                                                                                        | Acyl Carrier Protein                             | 251, 253                         |
| 76  | Isu1                          | YPL135W   | Mito matrix | [Fe <sub>2</sub> S <sub>2</sub> ]                                                                           | Primary ISC scaffold                             | 251, 252, 253                    |
| 77  | Isu2                          | YOR226C   | Mito matrix | [Fe <sub>2</sub> S <sub>2</sub> ]                                                                           | Secondary ISC scaffold                           | 132                              |
| 78  | Yfh1 (FXN)                    | YDL120W   | Mito matrix | None or Fe <sup>II</sup>                                                                                    | Yeast Frataxin Homolog 1                         | 127, 128, 129, 130               |
| 79  | Yah1 (FDX2; FDX1L; FDX1; ADX) | YPL252C   | Mito matrix | [Fe <sub>2</sub> S <sub>2</sub> ]                                                                           | ferredoxin                                       | 33                               |
| 80  | Arh1                          | YDR376W   | Mito matrix | none                                                                                                        | Ferredoxin reductase                             | 33, 131                          |
| 81  | Grx5                          | YPL059W   | Mito matrix | [Fe <sub>2</sub> S <sub>2</sub> ] (can reductively couple forming [Fe <sub>4</sub> S <sub>4</sub> ])        | mitochondrial monothiol glutaredoxin 5           | 67                               |
| 82  | Jac1                          | YGL018C   | Mito matrix | None                                                                                                        | DnaJ type chaperone                              | 33, 133                          |
| 83  | Ssq1                          | YLR369W   | Mito matrix | None                                                                                                        | HSP70 chaperone                                  | 33, 133                          |
| 84  | Mge1                          | YOR232W   | Mito matrix | None                                                                                                        | Replaces ADP with ATP on Ssq1                    | 33                               |
| 85  | Isa1                          | YLL027W   | Mito matrix | [Fe <sub>4</sub> S <sub>4</sub> ]                                                                           | Fe <sub>4</sub> S <sub>4</sub> assembly          | 134                              |
| 86  | Isa2                          | YPR067W   | Mito matrix | [Fe <sub>4</sub> S <sub>4</sub> ]                                                                           | Fe <sub>4</sub> S <sub>4</sub> assembly          | 134                              |
| 87  | Iba57                         | YJR122W   | Mito matrix | [Fe <sub>4</sub> S <sub>4</sub> ]?                                                                          | Fe <sub>4</sub> S <sub>4</sub> assembly          | 134, 135, 136, 137, 138, 254     |
| 88  | Bol1 (BolA1)                  | YAL044W-A | Mito matrix | [Fe <sub>2</sub> S <sub>2</sub> ] (shared with Grx5)                                                        | Fe <sub>4</sub> S <sub>4</sub> transfer          | 67, 121, 134, 135, 136, 137, 138 |
| 89  | Bol3 (BolA3; Aim1)            | YAL046C   | Mito matrix | [Fe <sub>2</sub> S <sub>2</sub> ]                                                                           | Fe <sub>4</sub> S <sub>4</sub> chaperone         | 67, 139                          |
| 90  | Nfu1                          | YKL040C   | Mito matrix | [Fe <sub>4</sub> S <sub>4</sub> ] at homodimer interface                                                    | Fe <sub>4</sub> S <sub>4</sub> chaperone         | 67, 139                          |
| 91  | Lys4                          | YDR234W   | Mito matrix | [Fe <sub>4</sub> S <sub>4</sub> ]                                                                           | homoaconitase                                    | 140, 141, 142                    |
| 92  | Ilv3                          | YJR016C   | Mito matrix | [Fe <sub>4</sub> S <sub>4</sub> ] (putative)                                                                | Dihydroxyacid dehydratase                        | 143, 144, 162                    |
| 93  | Aco1                          | YLR304C   | Mito matrix | [Fe <sub>4</sub> S <sub>4</sub> ]; one Fe not coordinated                                                   | aconitase                                        | 139, 255                         |
| 94  | Aco2                          | YJL200C   | Mito matrix | [Fe <sub>4</sub> S <sub>4</sub> ]; one Fe not coordinated                                                   | Secondary aconitase                              | 139                              |
| 95  | Sdh2 (SDHB; ACN17)            | YLL041C   | Mito IM     | [Fe <sub>4</sub> S <sub>4</sub> ], [Fe <sub>3</sub> S <sub>4</sub> ], and [Fe <sub>2</sub> S <sub>2</sub> ] | Succinate dehydrogenase, ISC subunit             | 67                               |
| 96  | Sdh3 (Cyb3; Ykl4)             | YKL141W   | Mito IM     | Heme b shared with Sdh4                                                                                     | Succinate dehydrogenase, heme subunit            | 67, 256                          |
| 97  | Sdh4                          | YDR178W   | Mito IM     | Heme b shared with Sdh3                                                                                     | Succinate dehydrogenase                          | 67, 256                          |
| 98  | Bio2                          | YGR286C   | Mito matrix | [Fe <sub>4</sub> S <sub>4</sub> ] and [Fe <sub>2</sub> S <sub>2</sub> ]                                     | Biotin Synthase                                  | 145, 257, 258                    |
| 99  | Lip5                          | YOR196C   | Mito matrix | Two [Fe <sub>4</sub> S <sub>4</sub> ]                                                                       | Lipoic Acid Synthase                             | 146                              |
| 100 | Mrs3                          | YJL133W   | Mito IM     | None (Fe <sup>II</sup> transient)                                                                           | High-affinity iron importer into mitochondria    | 147                              |

|     |             |         |                             |                                                        |                                                                                  |                                |
|-----|-------------|---------|-----------------------------|--------------------------------------------------------|----------------------------------------------------------------------------------|--------------------------------|
| 101 | Mrs4        | YKR052C | Mito IM                     | None (Fe <sup>II</sup> transient)                      | High-affinity iron importer into mitochondria                                    | 147                            |
| 102 | Rim2 (Pyt1) | YBR192W | Mito IM                     | None (Fe <sup>II</sup> transient)                      | Low-affinity iron importer into mitochondria                                     | 148, 149                       |
| 103 | Coq6        | YGR255C | Mito IM (facing matrix)     | Heme b                                                 | Monooxygenase for CoQ biosynthesis                                               | 150,151, 152, 153, 154         |
| 104 | Coq7        | YOR125C | Mito IM                     | [Fe-O-Fe]                                              | 5-demethoxyubiquinone hydroxylase, mitochondrial (DMQ hydroxylase)               | 150, 151, 153, 154, 155, 156   |
| 105 | Cyt1 (Ctc1) | YOR065W | Mito IM                     | 1 heme c                                               | Cytochrome bc1; cytochrome c1 subunit                                            | 157, 259                       |
| 106 | Cob1 (Cytb) | Q0105   | Mito IM                     | Heme b <sub>H</sub> and Heme b <sub>L</sub>            | Cytochrome bc1; cytochrome b subunit                                             | 157, 259                       |
| 107 | Rip1        | YEL024W | Mito IM                     | [Fe <sub>2</sub> S <sub>2</sub> ] (with 2 His ligands) | Cytochrome bc1; Rieske protein                                                   | 157, 259                       |
| 108 | Cox1 (Oxi3) | Q0045   | Mito IM                     | Heme a and heme a <sub>3</sub>                         | Cytochrome c oxidase                                                             | 260                            |
| 109 | Cox15       | YER141W | Mito IM                     | Heme o → heme a (transient)                            | Heme A synthase                                                                  | 157, 159, 160, 161             |
| 110 | Cox10       | YPL172C | Mito IM                     | Heme b → heme o (transient)                            | Heme O synthase                                                                  | 262                            |
| 111 | Mss51       | YLR203C | Mito IM (facing matrix)     | Heme b                                                 | COX1 mRNA translational activator; Cox1 assembly (heme or O <sub>2</sub> sensor) | 49, 162                        |
| 112 | Cyc1        | YJR048W | Mito IMS                    | Heme c                                                 | Cytochrome c, isoform 1                                                          | 162                            |
| 113 | Cyc7        | YEL039C | Mito IMS                    | Heme c                                                 | Cytochrome c, isoform 2<br>Expressed under hypoxic conditions                    | 162                            |
| 114 | Cyc2        | YOR037W | Mito IMS                    | none                                                   | Cytochrome c lyase                                                               | 262                            |
| 115 | Cyb2 (Fcb2) | YML054C | Mito IMS                    | Heme b2                                                | L-lactate cytochrome c oxidoreductase                                            | 163                            |
| 116 | Dld1        | YDL174C | Mito IM                     | Heme b                                                 | D-Lactate dehydrogenase                                                          | 164                            |
| 117 | Hem15       | YOR176W | Mito IM                     | Fe <sup>II</sup> → Heme b                              | Ferrochelatase                                                                   | 5, 49, 51, 52, 162, 165, 125   |
| 118 | Atm1        | YMR301C | Mito IM                     | None                                                   | Sulfur and/or ISC exporter from mitos                                            | 27, 28, 33, 166, 167, 169, 170 |
| 119 | Mmt1        | YMR177W | Mito IM                     | None                                                   | Putative iron exporter                                                           | 171, 172, 173                  |
| 120 | Mmt2        | YPL224C | Mito IM                     | None (Fe <sup>II</sup> transiently)                    | Putative iron exporter                                                           | 171, 172, 173                  |
| 121 | Ccc1        | YLR220W | Vacuolar membrane           | None (Fe <sup>II</sup> , heme b transiently bound??)   | Vacuolar iron importer                                                           | 59, 174, 175                   |
| 122 | Fet5        | YFL041W | Vacuolar membrane           | Fe <sup>II</sup> /Fe <sup>III</sup> (transient)        | Vacuolar iron exporter; multicopper oxidase                                      | 14, 176, 178                   |
| 123 | Fth1        | YBR207W | Vacuolar membrane           | Fe <sup>III</sup> (transient)                          | Vacuolar iron exporter                                                           | 176                            |
| 124 | Fre6        | YLL051C | Vacuolar membrane           | Two heme b                                             | Vacuolar metalloredutase                                                         | 12, 14, 178                    |
| 125 | Smf3        | YLR034C | Vacuolar membrane           | Fe <sup>II</sup> (transient)                           | Vacuolar iron exporter; Nramp family                                             | 114, 177, 180                  |
| 126 | Ole1 (Mdm2) | YGL055W | ER membrane                 | [Fe-O-Fe] + heme b5 (exposed on cytosol face)          | Δ9 fatty acid desaturase                                                         | 181, 182, 183, 184             |
| 127 | Ncp1        | YHR042W | ER membrane                 | None (flavins)                                         | NADP-cytochrome P450 reductase                                                   | 201, 202, 203                  |
| 128 | Sur2 (Syr2) | YDR297W | ER membrane                 | [Fe-O-Fe]                                              | Sphinganine C4-hydroxylase                                                       | 185, 186, 187                  |
| 129 | Cyb5        | YNL111C | ER membrane; cytosolic face | Heme b                                                 | Cytochrome b5                                                                    | 188, 190, 205                  |
| 130 | Scs7        | YMR272C | ER                          | [Fe-O-Fe] + heme                                       | Sphingolipid alpha-hydroxylase                                                   | 172, 183, 184, 186,            |

|     |                                  |         |                                                              |                                   |                                                                                                      |                                                  |
|-----|----------------------------------|---------|--------------------------------------------------------------|-----------------------------------|------------------------------------------------------------------------------------------------------|--------------------------------------------------|
|     | (Fah1)                           |         | membrane                                                     | b5 (exposed on cytosol face)      |                                                                                                      | 263, 264                                         |
| 131 | Mpo1                             | YGL010W | ER membrane                                                  | Fe <sup>II</sup>                  | 2-hydroxy fatty acid dioxygenase                                                                     | 191                                              |
| 132 | Cyp51 (Erg11)                    | YHR007C | ER membrane facing cytosol                                   | Heme b (cys axial)                | Cytochrome P450 Lanosterol C-14 alpha-demethylase                                                    | 192, 193, 194, 195, 196, 197, 198, 199, 217, 265 |
| 133 | Erg25                            | YGR060W | ER membrane                                                  | [Fe-O-Fe]                         | Methylsterol monooxygenase 1                                                                         | 8, 209, 210, 211, 266                            |
| 134 | Erg3 (Pso6; Syr1)                | YLR056W | ER membrane                                                  | [Fe-O-Fe]                         | Sterol C5(6)-desaturase                                                                              | 182, 190, 204, 205, 206                          |
| 135 | Erg5                             | YMR015C | ER membrane                                                  | Heme b (cys axial)                | C-22 sterol desaturase                                                                               | 8, 207, 208, 209, 210, 211                       |
| 136 | Dap1 (PGRMC1)                    | YPL170W | ER (lacks a membrane-spanning sequence); endosomes; vacuoles | Heme b (tyrosine axial)           | Damage Response protein 1; Membrane-associated progesterone receptor component 1                     | 18, 196, 197, 212, 267                           |
| 137 | Hmx1                             | YLR205C | ER membrane                                                  | Heme b (transient)                | Heme oxygenase                                                                                       | 109, 213                                         |
| 138 | Yno1 (Aim14)                     | YGL160w | (perinuclear) ER membrane                                    | Bis-heme b                        | NADPH Oxidase (generates superoxide in an NADPH-dependent fashion. Regulates the actin cytoskeleton. | 214                                              |
| 139 | Grx6                             | YDL010W | ER and Golgi membranes; vacuoles                             | [Fe <sub>2</sub> S <sub>2</sub> ] | Class I 1-C-Grx Monothiol glutaredoxin                                                               | 68, 194, 215, 216, 217, 218, 219, 220, 268       |
| 140 | Fe <sup>II</sup> <sub>cyt</sub>  | None    | Cytosol                                                      | Nonheme mononuclear               | Low molecular mass nonproteinaceous                                                                  | 269                                              |
| 141 | Fe <sup>II</sup> <sub>mit</sub>  | None    | Mitochondria                                                 | Nonheme mononuclear               | Low molecular mass nonproteinaceous                                                                  | 112, 113, 227, 228                               |
| 142 | Fe <sup>II</sup> <sub>vac</sub>  | None    | Vacuoles                                                     | Nonheme mononuclear               | Low molecular mass nonproteinaceous                                                                  | 230                                              |
| 143 | Fe <sup>III</sup> <sub>vac</sub> | None    | Vacuoles                                                     | Nonheme mononuclear               | Low molecular mass polyphosphate                                                                     | 179, 229                                         |
| 144 | Heme b                           | None    | Mitochondria, cytosol, ER                                    | Heme b                            | Axial ligands not defined                                                                            | 270                                              |

#### Additional References:

238 R. Hassett and D. J. Kosman, Evidence for Cu(II) Reduction as a component of copper uptake by *Saccharomyces cerevisiae*, *J. Biol. Chem.*, 1995, **270**, 128–134.

239 C. W. Yun, M. Bauler, R. E. Moore, P. E. Klebba and C. C. Philpott, The role of the FRE family of plasma membrane reductases in the uptake of siderophore-iron in *Saccharomyces cerevisiae*, *J. Biol. Chem.*, 2001, **276**, 10218–10223.

240 D. J. A. Netz, M. Stumpfig, C. Dore, U. Muhlenhoff, A. J. Pierik and R. Lill, Tah18 transfers electrons to Dre2 in cytosolic iron-sulfur protein biogenesis, *Nat. Chem. Biol.*, 2010, **6**, 758–765.

- 241 N. Soler, C. T. Craescu, J. Gallay, Y. M. Frapart, D. Mansuy, B. Raynal, G. Baldacci, A. Pastore, M. E. Huang and L. Vernis, S-adenosylmethionine methyltransferase-like domain within the essential, Fe-S-containing yeast protein Dre2, *FEBS J.*, 2012, **279**, 2108–2119.
- 242 Y. Zhang, E. R. Lyver, E. Nakamaru-Ogiso, H. Y. Yoon, B. Amutha, D. W. Lee, E. Bi, T. Ohnishi, F. Daldal, D. Pain and A. Dancis, Dre2, a conserved eukaryotic Fe/S cluster protein, functions in cytosolic Fe/S protein biogenesis, *Mol. Cell. Biol.*, 2008, **28**, 5569–5582.
- 243 L. Ben-Shimon, V. D. Paul, G. David-Kadoch, M. Volpe, M. Stuempfig, E. Bill, U. Mu̇hlenhoff, R. Lill and S. Ben-Aroya, Fe-S cluster coordination of the chromokinesin KIF4A alters its subcellular localization during mitosis, *J. Cell Sci.*, 2018, **131**, DOI: 10.1242/jcs.211433.
- 244 Z. G. Chen, X. Zhang, H. J. Li, H. W. Liu, Y. Z. Xia and L. Y. Xun, The complete pathway for thiosulfate utilization in *Saccharomyces cerevisiae*, *Appl. Environ. Microbiol.*, 2018, **84**, DOI: 10.1128/AEM.01241-18.
- 245 H. Ge, D. L. Perlstein, H. H. Nguyen, G. Bar, R. G. Griffin and J. Stubbe, Why multiple small subunits (Y2 and Y4) for yeast ribonucleotide reductase? Toward understanding the role of Y4, *Proc. Natl. Acad. Sci. U. S. A.*, 2001, **98**, 10067–10072.
- 246 C. A. Bonagura, B. Bhaskar, H. Shimizu, H. Y. Li, M. Sundaramoorthy, D. E. McRee, D. B. Goodin and T. L. Poulos, High-resolution crystal structures and spectroscopy of native and compound I cytochrome c peroxidase, *Biochemistry*, 2003, **42**, 5600–5608.
- 247 A. G. Baranovskiy, V. N. Duong, N. D. Babayeva, Y. B. Zhang, Y. I. Pavlov, K. S. Anderson and T. H. Tahirov, Activity and fidelity of human DNA polymerase depend on primer structure, *J. Biol. Chem.*, 2018, **293**, 6824–6843.
- 248 D. J. A. Netz, C. M. Stith, M. Stuempfig, G. Koepf, D. Vogel, H. M. Genau, J. L. Stodola, R. Lill, P. M. J. Burgers and A. J. Pierik, Eukaryotic DNA polymerases require an iron sulfur cluster for the formation of active complexes, *Nat. Chem. Biol.*, 2012, **8**, 125–132.
- 249 H. S. Kim, H. L. Kim, K. H. Kim, D. J. Kim, S. J. Lee, J. Y. Yoon, H. J. Yoon, H. Y. Lee, S. B. Park, S. J. Kim, J. Y. Lee and S. W. Suh, Crystal structure of Tpa1 from *Saccharomyces cerevisiae*, a component of the messenger ribonucleoprotein complex, *Nucleic Acids Res.*, 2010, **38**, 2099–2110.
- 250 L. T. Li, X. Jia, D. M. Ward and J. Kaplan, Yap5 protein-regulated transcription of the TYW1 gene protects yeast from high iron toxicity, *J. Biol. Chem.*, 2011, **286**, 38488–38497.
- 251 M. T. Boniecki, S. A. Freibert, U. Mu̇hlenhoff, R. Lill and M. Cygler, Structure and functional dynamics of the mitochondrial Fe/S cluster synthesis complex, *Nat. Commun.*, 2017, **8**, 1287, DOI: 10.1038/s41467-017-01497-1.

- 252 N. G. Fox, X. D. Yu, X. D. Feng, H. J. Bailey, A. Martelli, J. F. Nabhan, C. Strain-Damerell, C. Bulawa, W. W. Yue and S. Han, Structure of the human frataxin-bound iron-sulfur cluster assembly complex provides insight into its activation mechanism, *Nat. Commun.*, 2019, **10**, 2210, DOI: 10.1038/s41467-019-09989-y.
- 253 S. A. Cory, J. G. Van Vranken, E. J. Brignole, S. Patra, D. R. Winge, C. L. Drennan, J. Rutter and D. P. Barondeau, Structure of human Fe-S assembly subcomplex reveals unexpected cysteine desulfurase architecture and acyl-ACP-ISD11 interactions, *Proc. Natl. Acad. Sci. U. S. A.*, 2017, **114**, E5325–E5334.
- 254 E. Lebigot, P. Gaignard, I. Dorboz, A. Slama, M. Rio, P. deLonlay, B. Heron, F. Sabourdy, O. Boespflug-Tanguy, A. Cardoso, F. Habarou, C. Ottolenghi, P. Therond, C. Bouton, M. P. Golinelli-Cohen and A. Boutron, Impact of mutations within the [Fe-S] cluster or the lipoic acid biosynthesis pathways on mitochondrial protein expression profiles in fibroblasts from patients, *Mol. Genet. Metabol.*, 2017, **122**, 85–94.
- 255 H. Ye and T. A. Rouault, Human iron-sulfur cluster assembly, cellular iron homeostasis, and disease, *Biochemistry*, 2010, **49**, 4945–4956.
- 256 K. S. Oyedotun and B. D. Lemire, The quaternary structure of the *Saccharomyces cerevisiae* succinate dehydrogenase– Homology modeling, cofactor docking, and molecular dynamics simulation studies, *J. Biol. Chem.*, 2004, **279**, 9424–9431.
- 257 F. Depeint, W. R. Bruce, N. Shangari, R. Mehta and P. J. O'Brien, Mitochondrial function and toxicity: Role of the B vitamin family on mitochondrial energy metabolism, *Chem.-Biol. Interact.*, 2006, **163**, 94–112.
- 258 S. Jitrapakdee, A. Vidal-Puig and J. C. Wallace, Anaplerotic roles of pyruvate carboxylase in mammalian tissues, *Cell. Mol. Life Sci.*, 2006, **63**, 843–854.
- 259 B. L. Trumpower, Cytochrome bc1 complexes of microorganisms, *Microbiol. Rev.*, 1990, **54**, 101–129.
- 260 N. J. Robinson and D. R. Winge, Copper metallochaperones, *Annu. Rev. Biochem.*, 2010, **79**, 537–562.
- 261 Z. H. Wang, Y. X. Wang and E. L. Hegg, Regulation of the Heme A Biosynthetic Pathway: differential regulation of heme a synthase and heme o synthase in *Saccharomyces cerevisiae*, *J. Biol. Chem.*, 2009, **284**, 839–847.
- 262 J. W. A. Allen, Cytochrome c biogenesis in mitochondria–Systems III and V, *FEBS J.*, 2011, **278**, 4198–4216.
- 263 C. G. Duan, X. G. Wang, K. Tang, H. M. Zhang, S. K. Mangrauthia, M. G. Lei, C. C. Hsu, Y. J. Hou, C. G. Wang, Y. Li, W. A. Tao and J. K. Zhu, MET18 connects the cytosolic



iron-sulfur cluster assembly pathway to active DNA demethylation in Arabidopsis, *PLoS Genet.*, 2015, 11, DOI: 10.1371/journal.pgen.1005559.

264 H. G. Enoch, A. Catala and P. Strittmatter, Mechanism of rat-liver microsomal stearyl-CoA desaturase – studies of substrate-specificity, enzyme-substrate interactions, and function of lipid, *J. Biol. Chem.*, 1976, **251**, 5095–5103.

265 G. I. Lipesheva and M. R. Waterman, Sterol 14 alphasdemethylase cytochrome P450 (CYP51), a P450 in all biological kingdoms, *Biochim. Biophys. Acta, Gen. Subj.*, 2007, **1770**, 467–477.

266 L. T. Li and J. Kaplan, Characterization of yeast methyl sterol oxidase (ERG25) and identification of a human homologue, *J. Biol. Chem.*, 1996, **271**, 16927–16933.

267 R. A. Hand, N. Jia, M. Bard and R. J. Craven, *Saccharomyces cerevisiae* Dap1p, a novel DNA damage response protein related to the mammalian membrane-associated progesterone receptor, *Eukaryotic Cell*, 2003, **2**, 306–317.

268 M. Abdalla, W. A. Eltayb and A. Yousif, Comparison of structures among *Saccharomyces cerevisiae* Grxs proteins, *Genes Environ.*, 2018, 40, 17, DOI: 10.1186/s41021-018-0104-5.

269 R. C. Hider and X. Kong, Iron speciation in the cytosol: an overview, *Dalton Trans.*, 2013, **42**, 3220–3229.

270 D. A. Hanna, R. M. Harvey, O. Martinez-Guzman, X. J. Yuan, B. Chandrasekharan, G. Raju, F. W. Outten, I. Hamza and A. R. Reddi, Heme dynamics and trafficking factors revealed by genetically encoded fluorescent heme sensors, *Proc. Natl. Acad. Sci. U. S. A.*, 2016, **113**, 7539–7544.

**Table S2. Model Components.** The first 27 components of the model are protein groups. This is followed by 5 iron nonprotein groups and 8 noniron nonprotein groups for a total of 40 components. There are also 3 nutrients and 2 waste products. The prefix ‘a’ on protein groups (e.g. aFET3) means the apo form of the group. The double prefix ‘aa’ indicates an apo protein (e.g. aaCIA) that is metallated in two reactions, affording an intermediate form (aCIA) in which one type of iron center was inserted and the other was not. Subscripts ‘st’ and ‘tr’ mean stationary and transient, respectively. No stoichiometry is suggested for these reactions; substrates, catalysts, and products are indicated but not quantified. The list of reactions is incomplete but serves to illustrate the types of reactions involved.

| Number | Component | Members                                                                                                                      | Location                                                                                       | Iron center(s)                                                                                                                                                                                                                                                                                                                                                                                                          | Reactions that influence the component                                                                                                                                                                                                  | Reactions influenced by the component                                                                                                                                                                               |
|--------|-----------|------------------------------------------------------------------------------------------------------------------------------|------------------------------------------------------------------------------------------------|-------------------------------------------------------------------------------------------------------------------------------------------------------------------------------------------------------------------------------------------------------------------------------------------------------------------------------------------------------------------------------------------------------------------------|-----------------------------------------------------------------------------------------------------------------------------------------------------------------------------------------------------------------------------------------|---------------------------------------------------------------------------------------------------------------------------------------------------------------------------------------------------------------------|
| 1      | FET3      | Fet3<br>Ftr1<br>Fre1<br>Fre2<br>Fre3<br>Fre4<br>Fre5<br>Fre7<br>Fre8<br>Fit1<br>Fit2<br>Fit3<br>Arm1<br>Arm2<br>Arm3<br>Arm4 | Plasma membrane<br><br>Exceptions:<br>Fit1; wall<br>Fit2, wall<br>Fit3, wall<br>Fre5?<br>Fre8? | 2 heme b; Fre1<br>2 heme b; Fre2<br>2 heme b; Fre3<br>2 heme b; Fre4<br>2 heme b; Fre5<br>2 heme b; Fre7<br>2 heme b; Fre8                                                                                                                                                                                                                                                                                              | amino acids + ATP $\xrightarrow{[DNA][RIB][aAFT]}$ aFET3 (biosynthesis)<br><br>aFET3 + DAP $\xrightarrow{[Membrane]}$ FET3 + aDAP (metallation)                                                                                         | $Fe^{II}_{env} + O_2 + NAH \xrightarrow{[FET3][Membrane]} Fe^{II}_{cyt}$<br>(import of environmental iron into cytosol)                                                                                             |
| 2      | FET4      | Fet4<br>Smf1                                                                                                                 | Plasma membrane                                                                                | none                                                                                                                                                                                                                                                                                                                                                                                                                    | amino acids + ATP $\xrightarrow{[DNA][RIB][aAFT]}$ FET4<br><br>FET4 $\xrightarrow{[O_2]}$<br>(inhibition by O <sub>2</sub> )                                                                                                            | $Fe^{II}_{env} \xrightarrow{[FET4][Membrane]} Fe^{II}_{cyt}$<br>(import of environmental iron into cytosol)                                                                                                         |
| 3      | CCC       | Ccc1                                                                                                                         | Vacuolar membrane                                                                              | none                                                                                                                                                                                                                                                                                                                                                                                                                    | amino acids + ATP $\xrightarrow{[DNA][RIB][AFT]}$ CCC                                                                                                                                                                                   | $Fe^{II}_{cyt} \xrightarrow{[CCC][Membrane]} Fe^{II}_{vac}$<br>(transfer of cytosolic iron into vacuoles)                                                                                                           |
| 4      | FET5      | Fet5<br>Fth1<br>Fre6                                                                                                         | Vacuolar membrane                                                                              | 2 Heme b; Fre6                                                                                                                                                                                                                                                                                                                                                                                                          | amino acids + ATP $\xrightarrow{[DNA][RIB][aAFT]}$ aFET5<br><br>aFET5 + DAP $\xrightarrow{[Membrane]}$ FET5 + aDAP                                                                                                                      | $Fe^{II}_{vac} + O_2 + NAH \xrightarrow{[FET5][Membrane]} Fe^{II}_{cyt}$<br>(transfer of vacuolar iron into cytosol)                                                                                                |
| 5      | SMF       | Smf3                                                                                                                         | Vacuolar membrane                                                                              | none                                                                                                                                                                                                                                                                                                                                                                                                                    | amino acids + ATP $\xrightarrow{[DNA][RIB][aAFT]}$ SMF<br><br>SMF $\xrightarrow{[O_2]}$                                                                                                                                                 | $Fe^{II}_{vac} \xrightarrow{[SMF][Membrane]} Fe^{II}_{cyt}$<br>(transfer of vacuolar iron into cytosol)                                                                                                             |
| 6      | CIA       | Cfd1<br>Nbp35<br>Nar1<br>Cia1<br>Cia2<br>Mms19                                                                               | cytosol                                                                                        | [Fe <sub>4</sub> S <sub>4</sub> ] <sub>tr</sub> ; Cfd1<br>[Fe <sub>4</sub> S <sub>4</sub> ] <sub>tr</sub> ; Nbp35<br>[Fe <sub>4</sub> S <sub>4</sub> ] <sub>st</sub> ; Nbp35<br>[Fe <sub>4</sub> S <sub>4</sub> ] <sub>st</sub> ; Nar1<br>[Fe <sub>4</sub> S <sub>4</sub> ] <sub>tr</sub> ; Nar1<br>2[Fe <sub>2</sub> S <sub>2</sub> ] <sub>tr</sub> ; Cfd1<br>2[Fe <sub>2</sub> S <sub>2</sub> ] <sub>tr</sub> ; Nbp35 | amino acids + ATP $\xrightarrow{[DNA][RIB]}$ aaCIA<br><br>aaCIA + CIA $\longrightarrow$ 2aCIA<br>(autocatalysis)<br><br>aCIA + 2GRX + NAH $\xrightarrow{[DRE]}$ CIA + 2aGRX<br>(reductive coupling of 2Fe <sub>2</sub> S <sub>2</sub> ) | CIA + aLEU $\longrightarrow$ aCIA + LEU<br>(metallating a cytosolic protein)<br><br>CIA + aPOL $\longrightarrow$ aCIA + POL<br>(metallating a nuclear protein)                                                      |
| 7      | DRE       | Dre2<br>Tah18                                                                                                                | cytosol                                                                                        | 2 [Fe <sub>2</sub> S <sub>2</sub> ]; Dre2                                                                                                                                                                                                                                                                                                                                                                               | amino acids + ATP $\xrightarrow{[DNA][RIB]}$ aDRE<br><br>GRX + aDRE $\longrightarrow$ aGRX + DRE<br>(metallating DRE)                                                                                                                   | aCIA + 2GRX + NAH $\xrightarrow{[DRE]}$ CIA + 2aGRX<br><br>DRE catalyzing the reductive coupling of [Fe <sub>2</sub> S <sub>2</sub> ] clusters on the CIA.<br><br>Plus other reduction reactions...                 |
| 8      | LEU       | Leu1<br>Glt1<br>Met8<br>Met5                                                                                                 | cytosol                                                                                        | [Fe <sub>4</sub> S <sub>4</sub> ]; Leu1<br>[Fe <sub>4</sub> S <sub>4</sub> ]; Glt1<br>[Fe <sub>4</sub> S <sub>4</sub> ] and Fe <sup>II</sup> siroheme; Met5                                                                                                                                                                                                                                                             | amino acids + ATP $\xrightarrow{[DNA][RIB]}$ aaLEU<br><br>CIA + aaLEU $\longrightarrow$ aCIA + aLEU<br><br>Fe <sup>II</sup> cyt + aLEU $\longrightarrow$ LEU                                                                            | TCAM + ATP $\xrightarrow{[LEU]}$ amino acids<br>(synthesis of amino acids by LEU)                                                                                                                                   |
| 9      | RIB       | Rli1<br>Yae1<br>Lto1<br>Dph1<br>Dph2<br>Dph3<br>Cbr1<br>Dph4                                                                 | cytosol                                                                                        | [Fe <sub>4</sub> S <sub>4</sub> ]; Rli1<br>[Fe <sub>4</sub> S <sub>4</sub> ]; Dph1<br>[Fe <sub>4</sub> S <sub>4</sub> ]; Dph2<br>Fe <sup>II</sup> ; Dph3<br>Fe <sup>II</sup> ; Dph4<br>[Fe <sub>4</sub> S <sub>4</sub> ]; Elp3                                                                                                                                                                                          | amino acids + ATP $\xrightarrow{[DNA][RIB]}$ aaRIB<br><br>CIA + aaRIB $\longrightarrow$ aCIA + aRIB<br><br>Fe <sup>II</sup> cyt + aRIB $\longrightarrow$ RIB<br>(collectively autocatalytic synthesis of RIB)                           | amino acids + ATP $\xrightarrow{[DNA][RIB][aAFT]}$ proteins of the iron regulon<br><br>amino acids + ATP $\xrightarrow{[DNA][RIB]}$ all other proteins<br>(RIB catalyzes the synthesis of all proteins in the cell) |

|    |     |                                                                                               |                     |                                                                                                                                                                                                                                                                                                                                                                                                                            |                                                                                                                                                                                                                         |                                                                                                                                                                                                 |
|----|-----|-----------------------------------------------------------------------------------------------|---------------------|----------------------------------------------------------------------------------------------------------------------------------------------------------------------------------------------------------------------------------------------------------------------------------------------------------------------------------------------------------------------------------------------------------------------------|-------------------------------------------------------------------------------------------------------------------------------------------------------------------------------------------------------------------------|-------------------------------------------------------------------------------------------------------------------------------------------------------------------------------------------------|
| 10 | GRX | Elp3<br>Grx3<br>Grx4<br>Bol2                                                                  | cytosol             | [Fe <sub>2</sub> S <sub>2</sub> ]; Grx3<br>[Fe <sub>2</sub> S <sub>2</sub> ]; Grx4<br>[Fe <sub>2</sub> S <sub>2</sub> ]; Bol2                                                                                                                                                                                                                                                                                              | amino acids + ATP $\xrightarrow{[DNA][RIB]}$ aGRX<br><br>aGRX + ISU + ATP $\xrightarrow{ATM}$ GRX + aISU<br>(GRX is metallated by the ATM-dependentr export of [Fe <sub>2</sub> S <sub>2</sub> ] from mitos to cytosol) | 2GRX + aCIA+NAH $\xrightarrow{DRE}$ 2aGRX + CIA<br><br>GRX + aAFT $\longrightarrow$ aGRX + AFT<br><br>GRX + aDRE $\longrightarrow$ aGRX + DRE<br>(GRX metallates proteins in the cytosol)       |
| 11 | NUC | Rnr2<br>Rnr4<br>Ade4<br>Tyw1<br>Bna1                                                          | cytosol             | [Fe-O-Fe]; Rnr2<br>[Fe <sub>4</sub> S <sub>4</sub> ]; Ade4<br>[Fe <sub>4</sub> S <sub>4</sub> ]; Tyw1<br>Fe <sup>II</sup> ; Bna1                                                                                                                                                                                                                                                                                           | amino acids + ATP $\xrightarrow{[DNA][RIB]}$ aaNUC<br><br>Fe <sup>II</sup> cyt + aaNUC $\xrightarrow{[DRE]}$ aNUC<br><br>CIA + aNUC $\longrightarrow$ aCIA + NUC                                                        | amino acids + ATP $\xrightarrow{[NUC]}$ nucleotides<br><br>(NUC catalyzes the synthesis of nucleotides from amino acids)                                                                        |
| 12 | CAT | Cta1<br>Ctt1<br>Yhb1<br>Ccp1<br>Grx6                                                          | cytosol             | Heme b; Cta1 (5)<br>Heme b; Ctt1<br>Heme b; Yhb1<br>Heme b; Ccp1<br>[Fe <sub>2</sub> S <sub>2</sub> ]; Grx6                                                                                                                                                                                                                                                                                                                | amino acids + ATP $\xrightarrow{[DNA][RIB]}$ aaCAT<br><br>aaCAT + DAP $\longrightarrow$ aCAT+ DAP<br><br>aCAT + GRX $\longrightarrow$ CAT + aGRX                                                                        | ROS $\xrightarrow{[CAT]}$<br><br>(CAT catalyzes the decomposition of ROS)                                                                                                                       |
| 13 | CTH | Cth1<br>Cth2                                                                                  | cytosol             | none                                                                                                                                                                                                                                                                                                                                                                                                                       | amino acids + ATP $\xrightarrow{[DNA][RIB]}$ CTH                                                                                                                                                                        | aaaETC (or aaETC or aETC or ETC) $\xrightarrow{[CTH]}$<br><br>(CTH catalyzes the degradation of ETC)                                                                                            |
| 14 | AFT | Aft1<br>Aft2<br>Yap5                                                                          | nucleus/<br>cytosol | [Fe <sub>2</sub> S <sub>2</sub> ] <sub>n</sub> ; Aft1<br>[Fe <sub>2</sub> S <sub>2</sub> ] <sub>n</sub> ; Aft2<br>[Fe <sub>2</sub> S <sub>2</sub> ]; Yap5                                                                                                                                                                                                                                                                  | amino acids + ATP $\xrightarrow{[DNA][RIB]}$ aAFT<br><br>GRX + aAFT <sub>n</sub> $\rightleftharpoons$ aGRX + AFT <sub>c</sub>                                                                                           | amino acids + ATP $\xrightarrow{[DNA][RIB][aAFT]}$ proteins of the iron regulon<br><br>(aAFT catalyzes the expression of the iron regulon)                                                      |
| 15 | DAP | Dap1                                                                                          | Cytosol             | Heme b; Dap1                                                                                                                                                                                                                                                                                                                                                                                                               | amino acids + ATP $\xrightarrow{[DNA][RIB]}$ aDAP<br><br>aDAP + heme b $\rightarrow$ DAP                                                                                                                                | aHAP + DAP $\rightleftharpoons$ HAP + aDAP<br><br>aMEM + DAP $\xrightarrow{[Membrane]}$ MEM + aDAP<br><br>(DAP transfers a heme onto aHAP and aMEM)                                             |
| 16 | HAP | Hap1<br>Hap2<br>Hap3<br>Hap4<br>Hap5<br>Rox1                                                  | Nucleus             | Heme b; Hap1                                                                                                                                                                                                                                                                                                                                                                                                               | amino acids + ATP $\xrightarrow{[DNA][RIB]}$ aHAP<br><br>aHAP + DAP $\rightleftharpoons$ HAP + aDAP                                                                                                                     | amino acids + ATP $\xrightarrow{[DNA][RIB][HAP]}$ aaaETC<br><br>(HAP catalyzes the synthesis of aaaETC)                                                                                         |
| 17 | POL | Ntg2<br>Dna2<br>Pri2<br>Pol1<br>Pol2<br>Pol3<br>Rad3<br>Chl1<br>Rev3<br>Tpa1                  | Nucleus             | [Fe <sub>4</sub> S <sub>4</sub> ]; Ntg2<br>[Fe <sub>4</sub> S <sub>4</sub> ]; Dna2<br>[Fe <sub>4</sub> S <sub>4</sub> ]; Pri2<br>[Fe <sub>4</sub> S <sub>4</sub> ]; Pol1<br>[Fe <sub>4</sub> S <sub>4</sub> ]; Pol2<br>[Fe <sub>4</sub> S <sub>4</sub> ]; Pol3<br>[Fe <sub>4</sub> S <sub>4</sub> ]; Rad3<br>[Fe <sub>4</sub> S <sub>4</sub> ]; Chl1<br>[Fe <sub>4</sub> S <sub>4</sub> ]; Rev3<br>Fe <sup>II</sup> ; Tpa1 | amino acids + ATP $\xrightarrow{[DNA][RIB]}$ aPOL<br><br>CIA + Fe <sup>II</sup> cyt + aPOL+ NAH $\xrightarrow{[DRE]}$ aCIA + POL                                                                                        | nucleotides $\xrightarrow{[POL][DNA]}$ DNA                                                                                                                                                      |
| 18 | ISU | Isu1<br>Isu2<br>Yfh1<br>Nfs1<br>Isd11<br>Acp1<br>Jac1<br>Ssq1<br>Mge1<br>Grx5<br>Yah1<br>Arh1 | Mito matrix         | [Fe <sub>2</sub> S <sub>2</sub> ] <sub>n</sub> ; Grx5<br>[Fe <sub>2</sub> S <sub>2</sub> ] <sub>n</sub> ; Isu1<br>[Fe <sub>2</sub> S <sub>2</sub> ] <sub>n</sub> ; Isu2<br>[Fe <sub>2</sub> S <sub>2</sub> ]; Yah1                                                                                                                                                                                                         | amino acids + ATP $\xrightarrow{[DNA][RIB]}$ aISU<br><br>Fe <sup>II</sup> <sub>mit</sub> + ATP + NAH + aISU $\longrightarrow$ ISU                                                                                       | ISU + ATP + aGRX $\xrightarrow{[ATM][Membrane]}$ GRX + aISU<br><br>2ISU + aISA + NAH $\longrightarrow$ 2aISU + ISA<br><br>2ISU + aaTCA $\longrightarrow$ 2aISU + aTCA                           |
| 19 | ISA | Isa1<br>Isa2<br>Iba57<br>Bol1<br>Bol3<br>Nfu1                                                 | Mito matrix         | Isa1 [Fe <sub>4</sub> S <sub>4</sub> ]<br>Isa2 [Fe <sub>4</sub> S <sub>4</sub> ]<br>Bol1 [Fe <sub>2</sub> S <sub>2</sub> ]<br>Bol3 [Fe <sub>2</sub> S <sub>2</sub> ]<br>Nfu1 [Fe <sub>4</sub> S <sub>4</sub> ]                                                                                                                                                                                                             | amino acids + ATP $\xrightarrow{[DNA][RIB]}$ aaISA<br><br>ISA + aaISA $\longrightarrow$ 2aISA<br>(autocatalytic)<br><br>2ISU + aISA + NAH $\longrightarrow$ 2aISU + ISA<br>(reductive coupling)                         | ISA +aaaTCA $\longrightarrow$ aISA + aaTCA<br><br>ISA +aLYS $\longrightarrow$ aISA + LYS<br><br>(ISA metallates [Fe <sub>4</sub> S <sub>4</sub> ] containing proteins in mitochondria)          |
| 20 | LYS | Lys4<br>Ilv3                                                                                  | Mito matrix         | [Fe <sub>4</sub> S <sub>4</sub> ] (Lys4)<br>[Fe <sub>4</sub> S <sub>4</sub> ] putative (Ilv3)                                                                                                                                                                                                                                                                                                                              | amino acids + ATP $\xrightarrow{[DNA][RIB]}$ aLYS<br><br>ISA +aLYS $\longrightarrow$ aISA + LYS                                                                                                                         | TACM + ATP $\xrightarrow{[LYS]}$ amino acids<br>(LYS catalyzes the synthesis of amino acids)                                                                                                    |
| 21 | TCA | Aco1<br>Aco2<br>Sdh2<br>Sdh3<br>Sdh4<br>Bio2<br>Lip5                                          | Mito matrix         | [Fe <sub>4</sub> S <sub>4</sub> ]; Aco1<br>[Fe <sub>4</sub> S <sub>4</sub> ]; Aco2<br>[Fe <sub>4</sub> S <sub>4</sub> ]; [Fe <sub>2</sub> S <sub>2</sub> ];<br>[Fe <sub>2</sub> S <sub>2</sub> ]; Sdh2<br>heme b; Sdh3<br>[Fe <sub>4</sub> S <sub>4</sub> ]; [Fe <sub>2</sub> S <sub>2</sub> ];<br>Bio2<br>2[Fe <sub>4</sub> S <sub>4</sub> ]; Lip5                                                                        | amino acids + ATP $\xrightarrow{[DNA][RIB]}$ aaaTCA<br><br>ISA +aaaTCA $\longrightarrow$ aISA + aaTCA<br><br>ISU +aaTCA $\longrightarrow$ aISU + aTCA<br><br>DAP + aTCA $\longrightarrow$ TCA                           | acetyl-CoA $\xrightarrow{[TCA][TCAM]}$ CO <sub>2</sub> + NAH<br><br>(TCA catalyzes the TCA cycle)<br><br>acetyl-CoA $\xrightarrow{[TCA]}$ TCAM<br>(TCA also catalyzes the TCA filling reaction) |
| 22 | MRS | Mrs3<br>Mrs4                                                                                  | Mito IM             | none                                                                                                                                                                                                                                                                                                                                                                                                                       | amino acids +                                                                                                                                                                                                           | Fe <sup>II</sup> cyt $\xrightarrow{[MRS][Membrane][ETC]}$ Fe <sup>II</sup> mit                                                                                                                  |

|    |                  |                                                                                                                         |               |                                                                                                                                                                                                                                                                                                       |                                                                                                                                                                                                                                                                                                                                                                                                               |                                                                                                                                                                                                                                                                                                                                                                                                                                                                                                                                                                                |
|----|------------------|-------------------------------------------------------------------------------------------------------------------------|---------------|-------------------------------------------------------------------------------------------------------------------------------------------------------------------------------------------------------------------------------------------------------------------------------------------------------|---------------------------------------------------------------------------------------------------------------------------------------------------------------------------------------------------------------------------------------------------------------------------------------------------------------------------------------------------------------------------------------------------------------|--------------------------------------------------------------------------------------------------------------------------------------------------------------------------------------------------------------------------------------------------------------------------------------------------------------------------------------------------------------------------------------------------------------------------------------------------------------------------------------------------------------------------------------------------------------------------------|
|    |                  | Rim2                                                                                                                    |               |                                                                                                                                                                                                                                                                                                       | $ATP \xrightarrow{[DNA][RIB][Membrane]} MRS$                                                                                                                                                                                                                                                                                                                                                                  | (MRS catalyzes the transfer of cytosolic iron into the mitochondria)                                                                                                                                                                                                                                                                                                                                                                                                                                                                                                           |
| 23 | ATM              | Atm1<br>Mmt1<br>Mmt2                                                                                                    | Mito IM       | none                                                                                                                                                                                                                                                                                                  | amino acids +<br>$ATP \xrightarrow{[DNA][RIB][Membrane]} ATM$                                                                                                                                                                                                                                                                                                                                                 | $ISU + aGRX + ATP \xrightarrow{[ATM][Membrane]} GRX + aISU$<br>(ATM catalyzes the transfer of $[Fe_2S_2]$ clusters from the mito to the cytosol, where it coordinates aGRX)                                                                                                                                                                                                                                                                                                                                                                                                    |
| 24 | ETC              | Cyt1<br>Cob1<br>Rip1<br>Coq6<br>Coq7<br>Cox10<br>Cox15<br>Mss51<br>Cox1<br>Cyc1<br>Cyc7<br>Cyc2<br>Cyb2<br>Dld1<br>Yno1 | Mito IM       | heme c; Cyt1<br>heme b <sub>H</sub> /b <sub>L</sub> ; Cob1<br>$[Fe_2S_2]$ ; Rip1<br>heme b; Coq6<br>$[Fe-O-Fe]$ ; Coq7<br>Heme b → o; Cox10<br>Heme o → a; Cox15<br>Heme b; Mss51<br>heme a; Cox1<br>heme c; Cyc1<br>heme c; Cyc7<br>heme b → e; Cyc2<br>heme b; Cyb2<br>heme b; Dld1<br>heme b; Yno1 | amino acids + ATP<br>$\xrightarrow{[DNA][RIB][Membrane][HAP]} aaaETC$<br><br>heme b + aaaETC $\xrightarrow{[Membrane]} aaETC$<br><br>$GRX + aaETC \xrightarrow{[Membrane]} aGRX + aETC$<br><br>$Fe^{II}cyt + aETC \xrightarrow{[Membrane]} ETC$                                                                                                                                                               | $NAH + O_2 \xrightarrow{[ETC][Membrane]} ATP + ROS$<br><br>(ETC catalyzes the reduction of $O_2$ by NAH to generate ATP and ROS)                                                                                                                                                                                                                                                                                                                                                                                                                                               |
| 25 | HEM              | Hem15                                                                                                                   | Mito IM       | $Fe^{II}_{mit} \rightarrow$ heme b                                                                                                                                                                                                                                                                    | amino acids +<br>$ATP \xrightarrow{[DNA][RIB][Membrane]} aHEM$                                                                                                                                                                                                                                                                                                                                                | $Fe^{II}_{mit} + TCAM \xrightarrow{[HEM][Membrane]} heme\ b$<br><br>HEM catalyzes the synthesis of heme b from TCAM                                                                                                                                                                                                                                                                                                                                                                                                                                                            |
| 26 | MEM              | Ole1<br>Ncp1<br>Sur2<br>Scs7<br>Cyp51<br>Erg25<br>Erg5<br>Erg3<br>Cyb5<br>Mpo1                                          | ER membrane   | $[Fe-O-Fe]$ , Heme b; Ole1<br>$[Fe-O-Fe]$ ; Sur2<br>$[Fe-O-Fe]$ , heme b; Scs7<br>Heme b; Cyp51<br>$[Fe-O-Fe]$ ; Erg25<br>Heme b; Erg5<br>$[Fe-O-Fe]$ ; Erg3<br>Heme b; Cyb5<br>$Fe^{II}$ ; Mpo1                                                                                                      | amino acids + ATP $\xrightarrow{[DNA][RIB]} aaMEM$<br><br>$aaMEM + Fe^{II}cyt \xrightarrow{[Membrane]} aMEM$<br><br>$aMEM + DAP \xrightarrow{[Membrane]} MEM + aDAP$                                                                                                                                                                                                                                          | acetyl-CoA + NAH +<br>$O_2 \xrightarrow{[MEM][membrane]} Membrane$<br>(MEM catalyzes the synthesis of membrane)                                                                                                                                                                                                                                                                                                                                                                                                                                                                |
| 27 | HMX              | Hmx1                                                                                                                    | ER membrane   | Heme b → $Fe^{II}$ ;<br>Hmx1                                                                                                                                                                                                                                                                          | amino acids + ATP $\xrightarrow{[DNA][RIB]} HMX$                                                                                                                                                                                                                                                                                                                                                              | $MEM + O_2 + NAH \xrightarrow{[HMX]} Fe^{II}_{cyt}$<br><br>$Heme\ b + O_2 + NAH \xrightarrow{[HMX]} Fe^{II}_{cyt}$<br>(HMX catalyzes the degradation of hemes to generate cytosolic iron)                                                                                                                                                                                                                                                                                                                                                                                      |
| 28 | $Fe^{II}_{cyt}$  | Iron nonprotein                                                                                                         | Cytosol       | LMM Nonheme high-spin $Fe^{II}$                                                                                                                                                                                                                                                                       | $Fe^{env} + O_2 + NAH \xrightarrow{[FET3][Membrane]} Fe^{II}_{cyt}$<br><br>$Fe^{env} \xrightarrow{[FET4][Membrane]} Fe^{II}_{cyt}$<br><br>$Fe^{III}_{vac} + NAH + O_2 \xrightarrow{[FET5][Membrane]} Fe^{II}_{cyt}$<br><br>$Fe^{II}_{vac} \xrightarrow{[SMF3][Membrane]} Fe^{II}_{cyt}$<br><br>$MEM + O_2 + NAH \xrightarrow{[HMX]} Fe^{II}_{cyt}$<br><br>$DAP + O_2 + NAH \xrightarrow{[HMX]} Fe^{II}_{cyt}$ | $Fe^{II}_{cyt} + aRIB + NAH + O_2 \xrightarrow{[DRE]} RIB$<br>( $Fe^{II}_{cyt}$ metallates many cytosolic proteins)<br><br>$Fe^{II}_{cyt} \xrightarrow{[MRS][Membrane][ETC]} Fe^{II}_{mit}$<br><br>$Fe^{II}_{cyt} \xrightarrow{[CCC][Membrane]} Fe^{II}_{vac}$<br>( $Fe^{II}_{cyt}$ is transported to mitochondria and vacuoles)<br><br>$Fe^{II}_{cyt} + aaMEM \xrightarrow{[Membrane]} aMEM$<br>(Cytosolic iron metallates aaMEM located in the ER)<br><br>$Fe^{II}_{cyt} + O_2 \rightarrow NP + ROS$<br>(Cytosolic iron reacts with $O_2$ to generate nanoparticles and ROS) |
| 29 | $Fe^{II}_{mit}$  | Iron nonprotein                                                                                                         | Mito Matrix   | LMM Nonheme high-spin $Fe^{II}$                                                                                                                                                                                                                                                                       | $Fe^{II}_{cyt} \xrightarrow{[MRS][Membrane][ETC]} Fe^{II}_{mit}$                                                                                                                                                                                                                                                                                                                                              | $Fe^{II}_{mit} + ATP + NAH + aISU \xrightarrow{YAH} ISU$<br>( $Fe^{II}_{mit}$ is a substrate for the synthesis of $[Fe_2S_2]$ clusters in the mitochondria)<br><br>$Fe^{II}_{mit} + TCAM \xrightarrow{[HEM][Membrane]} heme\ b$<br>( $Fe^{II}_{mit}$ is a substrate for the synthesis of heme b)                                                                                                                                                                                                                                                                               |
| 30 | $Fe^{II}_{vac}$  | Iron nonprotein                                                                                                         | Vacuole lumen | LMM Nonheme high-spin $Fe^{II}$                                                                                                                                                                                                                                                                       | $Fe^{II}_{cyt} \xrightarrow{[CCC][Membrane]} Fe^{II}_{vac}$                                                                                                                                                                                                                                                                                                                                                   | $Fe^{II}_{vac} \xrightarrow{[SMF3][Membrane]} Fe^{II}_{cyt}$<br>( $Fe^{II}_{vac}$ can be exported into the cytosol)<br><br>$Fe^{II}_{vac} + O_2 \rightarrow Fe^{III}_{vac}$<br>( $Fe^{II}_{vac}$ can get oxidized to $Fe^{III}_{vac}$ by $O_2$ )                                                                                                                                                                                                                                                                                                                               |
| 31 | $Fe^{III}_{vac}$ | Iron nonprotein                                                                                                         | Vacuole lumen | LMM Nonheme high-spin $Fe^{III}$                                                                                                                                                                                                                                                                      | $Fe^{II}_{vac} + O_2 \rightarrow Fe^{III}_{vac}$                                                                                                                                                                                                                                                                                                                                                              | $Fe^{III}_{vac} + NAH + O_2 \xrightarrow{[FET5][Membrane]} Fe^{II}_{cyt}$<br>( $Fe^{III}_{vac}$ must become reduced and then transferred into the cytosol)                                                                                                                                                                                                                                                                                                                                                                                                                     |
| 32 | Heme b           | Iron nonprotein                                                                                                         | Mito IM       | Heme b                                                                                                                                                                                                                                                                                                | $Fe^{II}_{mit} + TCAM \xrightarrow{[HEM][Membrane]} Heme\ b$                                                                                                                                                                                                                                                                                                                                                  | Heme b + aDAP → DAP<br>(Heme b is used to metallate aDAP, which then leaves the mito to metallate other proteins in the cell)<br><br>Heme b + aTCA → TCA<br>(Heme b can directly metallate mito proteins)                                                                                                                                                                                                                                                                                                                                                                      |

|    |                   |            |                                     |      |                                                                                                 |                                                                                                                                                                                                                                                                                                                                                                                                                                                                                                                                       |
|----|-------------------|------------|-------------------------------------|------|-------------------------------------------------------------------------------------------------|---------------------------------------------------------------------------------------------------------------------------------------------------------------------------------------------------------------------------------------------------------------------------------------------------------------------------------------------------------------------------------------------------------------------------------------------------------------------------------------------------------------------------------------|
|    |                   |            |                                     |      |                                                                                                 | Heme b + O <sub>2</sub> + NAH $\xrightarrow{[HMX]}$ Fe <sup>II</sup> <sub>cyt</sub><br>(Heme b can be degraded by HMX)                                                                                                                                                                                                                                                                                                                                                                                                                |
| 33 | ATP               | nonprotein | All regions                         | none | NAH + O <sub>2</sub> $\xrightarrow{[ETC][Membrane]}$ ATP + ROS<br>(ATP is generated by the ETC) | TCAM + ATP $\xrightarrow{[LEU]}$ amino acids<br><br>amino acids + ATP $\xrightarrow{[DNA][RIB][aAFT]}$ all iron regulon proteins<br><br>(ATP is used to drive anabolic processes)<br><br>ISU + ATP + aGRX $\xrightarrow{[ATM][Membrane]}$ GRX + aISU<br>(ATP is used to drive the export of [Fe <sub>2</sub> S <sub>2</sub> ] clusters from mitos)                                                                                                                                                                                    |
| 34 | NAH               | nonprotein | All regions                         | none | Acetyl-CoA $\xrightarrow{[TCA]}$ CO <sub>2</sub> + NAH                                          | Fe <sup>env</sup> + O <sub>2</sub> + NAH $\xrightarrow{[FET3][Membrane]}$ Fe <sup>II</sup> <sub>cyt</sub><br><br>Acetyl-CoA + NAH + O <sub>2</sub> $\xrightarrow{[MEM]}$ Membrane<br><br>aCIA + 2GRX + NAH $\xrightarrow{[DRE]}$ CIA + 2 aGRX<br>(reductive coupling of 2Fe <sub>2</sub> S <sub>2</sub> )                                                                                                                                                                                                                             |
| 35 | TCAM              | nonprotein | Mito matrix                         | none | acetyl-CoA $\xrightarrow{[TCA]}$ TCAM                                                           | Fe <sup>II</sup> <sub>mit</sub> + TCAM $\xrightarrow{[Hem15][Membrane]}$ heme b<br><br>TCAM + ATP $\xrightarrow{[LYS]}$ amino acids                                                                                                                                                                                                                                                                                                                                                                                                   |
| 36 | amino acids       | nonprotein | Mito matrix and cytosol             | none | TCAMe + ATP $\xrightarrow{[LEU]}$ amino acids                                                   | amino acids + ATP $\xrightarrow{[DNA][RIB]}$ other soluble proteins<br><br>(amino acids are substrates for protein synthesis)<br><br>amino acids + ATP $\xrightarrow{[NUC]}$ nucleotides<br>(amino acids are substrates for synthesis of nucleotides)                                                                                                                                                                                                                                                                                 |
| 37 | Nucleotides       | nonprotein | Cytosol/nucleus                     | none | amino acids + ATP $\xrightarrow{[NUC]}$ nucleotides                                             | nucleotides $\xrightarrow{[DNAR][DNA]}$ DNA                                                                                                                                                                                                                                                                                                                                                                                                                                                                                           |
| 38 | DNA               | nonprotein | nucleus                             | None | nucleotides $\xrightarrow{[POL][DNA]}$ DNA                                                      | DNA + ROS $\longrightarrow$                                                                                                                                                                                                                                                                                                                                                                                                                                                                                                           |
| 39 | ROS               | nonprotein | All compartments                    | none | NAH + O <sub>2</sub> $\xrightarrow{[ETC][Membrane]}$ ATP + ROS                                  | ROS $\xrightarrow{[CAT]}$<br><br>DNA + ROS $\longrightarrow$                                                                                                                                                                                                                                                                                                                                                                                                                                                                          |
| 40 | Membrane          | nonprotein | Plasma, Vacuole, and Mito membranes | none | Acetyl-CoA + NAH + O <sub>2</sub> $\xrightarrow{[MEM][membrane]}$ Membrane                      | Fe <sup>env</sup> + O <sub>2</sub> + NAH $\xrightarrow{[FET3][Membrane]}$ Fe <sup>II</sup> <sub>cyt</sub><br><br>amino acids + ATP $\xrightarrow{[DNA][RIB][Membrane]}$ membrane bound proteins<br><br>(Membrane is a catalyst for reactions that take place at membranes)<br><br>Fe <sup>II</sup> <sub>cyt</sub> $\xrightarrow{[MRS][Membrane][ETC?]}$ Fe <sup>II</sup> <sub>mit</sub><br><br>NAH + O <sub>2</sub> $\xrightarrow{[ETC][Membrane]}$ ATP + ROS<br><br>Membrane + ROS $\longrightarrow$<br>(Membrane is damaged by ROS) |
|    |                   |            |                                     |      |                                                                                                 |                                                                                                                                                                                                                                                                                                                                                                                                                                                                                                                                       |
|    | Fe <sup>env</sup> | nutrient   |                                     |      |                                                                                                 | Fe <sup>env</sup> + O <sub>2</sub> + NAH $\xrightarrow{[FET3][Membrane]}$ Fe <sup>II</sup> <sub>cyt</sub><br>Fe <sup>env</sup> $\xrightarrow{[FET4][Membrane]}$ Fe <sup>II</sup> <sub>cyt</sub>                                                                                                                                                                                                                                                                                                                                       |
|    | Acetyl-CoA        | nutrient   |                                     |      |                                                                                                 | Acetyl-CoA $\xrightarrow{[TCA]}$ TCAM<br>Acetyl-CoA + NAH + O <sub>2</sub> $\xrightarrow{[MEM]}$ Membrane<br>Acetyl-CoA $\xrightarrow{[TCA][TCAM]}$ NAH + CO <sub>2</sub>                                                                                                                                                                                                                                                                                                                                                             |
|    | O <sub>2</sub>    | nutrient   |                                     |      |                                                                                                 | NAH + O <sub>2</sub> $\xrightarrow{[ETC][Membrane]}$ ATP + ROS<br><br>Many others                                                                                                                                                                                                                                                                                                                                                                                                                                                     |
|    | CO <sub>2</sub>   | waste      |                                     |      |                                                                                                 | Acetyl-CoA $\xrightarrow{[TCA][TCAM]}$ NAH + CO <sub>2</sub>                                                                                                                                                                                                                                                                                                                                                                                                                                                                          |
|    | NP                | waste      |                                     |      |                                                                                                 | Fe <sup>II</sup> <sub>mit</sub> + O <sub>2</sub> $\rightarrow$ NP + ROS                                                                                                                                                                                                                                                                                                                                                                                                                                                               |

|  |  |  |  |  |                                                                                      |  |
|--|--|--|--|--|--------------------------------------------------------------------------------------|--|
|  |  |  |  |  | $\text{Fe}^{\text{II}}_{\text{cyt}} + \text{O}_2 \rightarrow \text{NP} + \text{ROS}$ |  |
|--|--|--|--|--|--------------------------------------------------------------------------------------|--|
